# Supplementary material for: Longitudinal Changes In Pulmonary Function And Patient Reported Outcomes After Lung Cancer Surgery
Source: Research Square preprint supplement (doi:10.21203/rs.3.rs-1331424/v1), 2022-02-09
Supplement: Supplementary file 1 [file 446a706d82918573d2d5a9be.docx]

**Supplemental material**

**Tile:** Longitudinal changes in pulmonary function and patient reported outcomes after lung cancer surgery

**Authors:** Sumin Shin, MD, PhD1*, Sunga Kong, PhD 2,3*, Danbee Kang, PhD 2,4, Genehee Lee, MSN2,3, Hong Kwan Kim, MD, PhD 1, Young Mog Shim, MD, PhD 1,3, Juhee Cho, PhD 2,3,4,5†, Hye Yun Park, MD, PhD 2,6†

1Department of Thoracic and Cardiovascular Surgery, Samsung Medical Center, Sungkyunkwan University School of Medicine, Seoul, South Korea

2Department of Clinical Research Design and Evaluation, SAIHST, Sungkyunkwan University, Seoul, South Korea

3Patient-Centered Outcomes Research Institute, Samsung Medical Center, Seoul, South Korea

4Center for Clinical Epidemiology, Samsung Medical Center, Seoul, South Korea, 5Department of Epidemiology, Johns Hopkins University Bloomberg School of Public Health, Baltimore, MD, USA

6Division of Pulmonary and Critical Care Medicine, Department of Medicine, Samsung Medical Center, Sungkyunkwan University, School of Medicine, Seoul, South Korea,

* SS and SK contributed equally to this work

†JC and HYP contributed equally to this work.

**Corresponding author information**

Hye Yun Park, Division of Pulmonary and Critical Care Medicine, Department of Medicine, Samsung Medical Center, Sungkyunkwan University, School of Medicine, 81 Irwon-ro, Gangnam-gu, Seoul, 06351, South Korea, E-mail: hyeyunpark@skku.edu

Juhee Cho, Department of Clinical Research Design and Evaluation, SAIHST, Sungkyunkwan University, 81 Irwon-ro, Gangnam-gu, Seoul, 06351, Korea.

E-mail: jcho@skku.edu

**Supplementary Table 1** Postoperative changes in pulmonary function from baseline to 2 weeks, 6 months, and 1 year according to the type of surgery

|  | |  | |  | Before surgery | 2 weeks after surgery | 6 months after surgery | 1 year after surgery |
| --- | --- | --- | --- | --- | --- | --- | --- | --- |
| Overall | | | | |  |  |  |  |
|  | | mMRC dyspnea grade ≥ 2 | | |  |  |  |  |
|  | |  | | Adjusted proportion (SE) | 2.4 (0.6) | 26.3 (1.8) | 7.9 (1.2) | 5.2 (1) |
|  | |  | | OR comparing baseline (95% CI)a | Reference | 15.2 (8.5, 27.3) | 3.3 (1.8, 6.1) | 2.1 (1.1, 4) |
|  | | CAT ≥ 10 | | |  |  |  |  |
|  | |  | | Adjusted proportion (SE) | 21.6 (1.6) | 59.2 (2.0) | 20.1 (1.9) | 18.9 (1.8) |
|  | |  | | OR comparing baseline (95% CI)a | Reference | 6.0 (4.7, 7.6) | 1.4 (1.4, 1.8) | 0.8 (0.6, 1.1) |
| Type of surgery | | | | |  |  |  |  |
|  | mMRC dyspnea grade ≥ 2 | | | |  |  |  |  |
|  | Adjusted proportion (SE) | | | |  |  |  |  |
|  |  | | Lobectomy | | 2.6 (0.7) | 27.4 (2.1) | 8 (1.4) | 5.3 (1.2) |
|  |  | | Pneumonectomy, Bilobectomy | | 0 (0) | 45.6 (11.2) | 16.3 (8.5) | 5.6 (5.4) |
|  |  | | Segmentectomy, Wedge resection | | 1.7 (1.2) | 18.2 (3.7) | 5.5 (2.3) | 4.6 (2.2) |
|  |  | | P values | | 0.85 | 0.03 | 0.31 | 0.97 |
|  | OR comparing baseline (95% CI)a | | | |  |  |  |  |
|  |  | | Lobectomy | | Reference | 15.3 (8.5, 27.5) | 3.2 (1.8, 5.8) | 1.9 (1.0, 3.7) |
|  |  | | Pneumonectomy, Bilobectomy | | Reference | 47.7 (3.4, 661.1) | 8.4 (0.6, 116.1) | 3.0 (0.7, 13.4) |
|  |  | | Segmentectomy, Wedge resection | | Reference | 13.5 (3.2, 57.8) | 3.4 (0.7, 15.3) | 3.0 (0.7, 13.4) |
|  |  | | P for interaction | |  | 0.82 | 0.89 | 0.59 |
|  | CAT ≥ 10 | | | |  |  |  |  |
|  | Adjusted proportion (SE) | | | |  |  |  |  |
|  |  | | Lobectomy | | 20.1 (1.8) | 61.5 (2.3) | 29.1 (2.2) | 19.2 (2.0) |
|  |  | | Pneumonectomy, Bilobectomy | | 39.3 (10.12 | 57.3 (10.7) | 52.8 (11.5) | 26.9 (10.9) |
|  |  | | Segmentectomy, Wedge resection | | 24.3 (3.9) | 50.9 (4.6) | 19.3 (3.9) | 16.5 (3.8) |
|  |  | | P values | | 0.07 | 0.12 | 0.01 | 0.60 |
|  | OR comparing baseline (95% CI)a | | | |  |  |  |  |
|  |  | | Lobectomy | | Reference | 15.2 (8.5, 27.3) | 3.3 (1.8, 6.1) | 2.1 (1.1, 4) |
|  |  | | Pneumonectomy, Bilobectomy | | Reference | 33.7 (3.5, 323) | 7.1 (0.8, 63.1) | 2.1 (1.1, 4) |
|  |  | | Segmentectomy, Wedge resection | | Reference | 13.4 (3.1, 57.4) | 3.4 (0.7, 15.3) | 2.8 (0.6, 12.8) |
|  |  | | P for interaction | |  | <0.01 | 0.03 | 0.37 |

Baseline values were used as reference.

*Adjusted for age, sex, stage, obesity, smoking status, cell type, type of surgery, video-assisted thoracic surgery, postoperative pulmonary complications, and adjuvant treatment.

*CAT*, chronic obstructive pulmonary disease assessment test; *CI*, confidence interval; *mMRC dyspnea scale*, modified Medical Research Council dyspnea scale; *SE*, standard error; *OR*, odds ratio.
